# Supplementary material for: Near-infrared fluorescent turn-on probe for hydrazine detection: environmental samples and live cell imaging
Source: Royal Society of Chemistry journal article supplement (doi:10.1039/d3ob00869j), 2023-01-01
Supplement: d3ob00869j1.pdf [file d3ob00869j1.pdf]

## *Electronic Supplementary Information*

### **Near-Infrared Fluorescent Turn-On Probe for Hydrazine Detection: Environmental Samples and live cell imaging**

**Anwasha Maiti,<sup>a</sup> Dipanjan Banik,<sup>a</sup> Satyajit Halder,<sup>b</sup> Saikat Kumar Manna,<sup>c</sup> Anirban Karak,<sup>a</sup> Kuladip Jana,<sup>b</sup> and Ajit Kumar Mahapatra<sup>a\*</sup>**

<sup>a</sup>Molecular Sensor and Supramolecular Chemistry Laboratory, Department of Chemistry, Indian Institute of Engineering Science and Technology, Shibpur, Howrah-711103, West Bengal, India, E-mail: akmahapatra@chem.iiests.ac.in

<sup>b</sup>Division of Molecular Medicine, Bose Institute, P 1/12, CIT Scheme VIIM, Kolkata-700054, India.

<sup>c</sup> Department of Chemistry, Haldia Government College, Debhog, Haldia, Purba Medinipur-721657, West Bengal, India.

#### **Table of Contents**

1. NMR Characterization data of compound **3** and **4**.
2. <sup>1</sup>H NMR of compound **3** in MeOH-d<sub>4</sub>.
3. <sup>13</sup>C NMR of compound **3** in MeOH-d<sub>4</sub>.
4. <sup>1</sup>H NMR of compound **4** in DMSO-d<sub>6</sub>.
5. <sup>13</sup>C NMR of compound **4** in DMSO-d<sub>6</sub>.
6. HRMS of probe **BPN**.
7. <sup>1</sup>H NMR of probe **BPN** in DMSO-d<sub>6</sub>.
8. <sup>13</sup>C NMR of probe **BPN** in DMSO-d<sub>6</sub>.
9. UV-vis absorbance spectra, fluorescence emission spectra and quantum yield of compound **3**
10. UV-vis absorbance spectra, fluorescence emission spectra and quantum yield of compound **4**.
11. UV-vis absorbance of probe **BPN**.
12. Comparative Fluorescence spectrum of compound **4** and **R1**.
13. Comparative UV-vis absorption spectrum of probe **BPN**, Compound **3** and **BPN** treated with N<sub>2</sub>H<sub>4</sub>.
14. Comparative Fluorescence spectrum of probe **BPN**, Compound **3** and **BPN** treated with N<sub>2</sub>H<sub>4</sub>.
15. Change of fluorescence emission intensity of **BPN** upon addition of interfering analytes and then hydrazine.
16. Change of fluorescence emission intensities of **BPN** in presence of hydrazine and other interfering analytes in 1:1 and n:1 crowded environments.
17. Detection limit calculation.
18. Kinetic plot of probe **BPN**.

19. Fluorescence quantum yield calculation.
20. MTT assay for determination cytotoxic effect of probe **BPN** on MDA-MB 231 cells.
21. Pictorial fluorescence intensity change of untreated cell and cell treated with hydrazine.
22. HRMS of **BPN-N<sub>2</sub>H<sub>4</sub> adduct**.
23. <sup>1</sup>H NMR titration of probe **BPN** upon addition of hydrazine.
24. Summary of previously reported hydrazine sensing fluorescent chemosensors with latest work.
25. References.

### Structure and NMR characterization data of compounds 3,4:

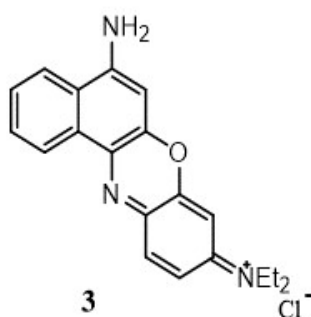

<sup>1</sup>H NMR (400 MHz, MeOH-d<sub>4</sub>): δ 0.63 (t, J=8.0Hz, 6H), 1.25(q, J=8.0Hz, 4H), 3.71 (s, 2H), 4.75 (s, 1H), 5.33 (d, J=8.0Hz, 2H), 6.43 (s, 1H), 7.30 (t, J=8.0Hz, 2H), 7.87 (d, J=8.0Hz, 1H), 7.96 (d, J=8.0Hz, 1H).

<sup>13</sup>C NMR (400 MHz, MeOH-d<sub>4</sub>): δ 11.40 (2C), 44.20 (2C), 90.50 (1C), 111.79 (1C), 120.21 (1C), 120.50 (1C), 121.20 (1C), 122.21 (1C), 122.70 (1C), 123.69 (1C), 123.96 (1C), 124.07 (2C), 125.30 (1C), 132.06 (1C), 140.07 (1C), 145.96 (1C), 148.77 (1C).

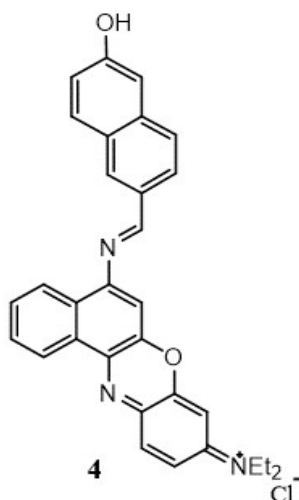

**<sup>1</sup>H NMR (400 MHz, DMSO-d<sub>6</sub>):** δ 1.26 (t, J=8.0Hz, 6H), 3.08 (s, 1H), 3.46 (q, J=8.0Hz, 4H), 5.39 (d, J=8.0Hz, 2H), 6.19 (s, 1H), 7.01 (d, J=8.0Hz, 2H), 7.03 (s, 1H), 7.05 (d, J=8.0Hz, 2H), 7.54 (t, J=8.0Hz, 2H), 7.96 (d, J=8.0Hz, 2H), 7.99 (d, J=8.0Hz, 1H), 9.50 (s, 1H), 11.0 (s, 1H).

**<sup>13</sup>C NMR (400 MHz, DMSO-d<sub>6</sub>):** δ 11.43 (2C), 44.70 (2C), 90.82 (1C), 99.38 (1C), 112.40 (1C), 120.21 (1C), 120.55 (1C), 121.24 (6C), 122.60 (1C), 122.77 (2C), 123.69 (2C), 123.71 (1C), 123.74 (2C), 126.06 (2C), 130.70 (1C), 132.45 (1C), 142.52 (1C), 149.31 (1C), 160.82(1C), 162.08 (1C).

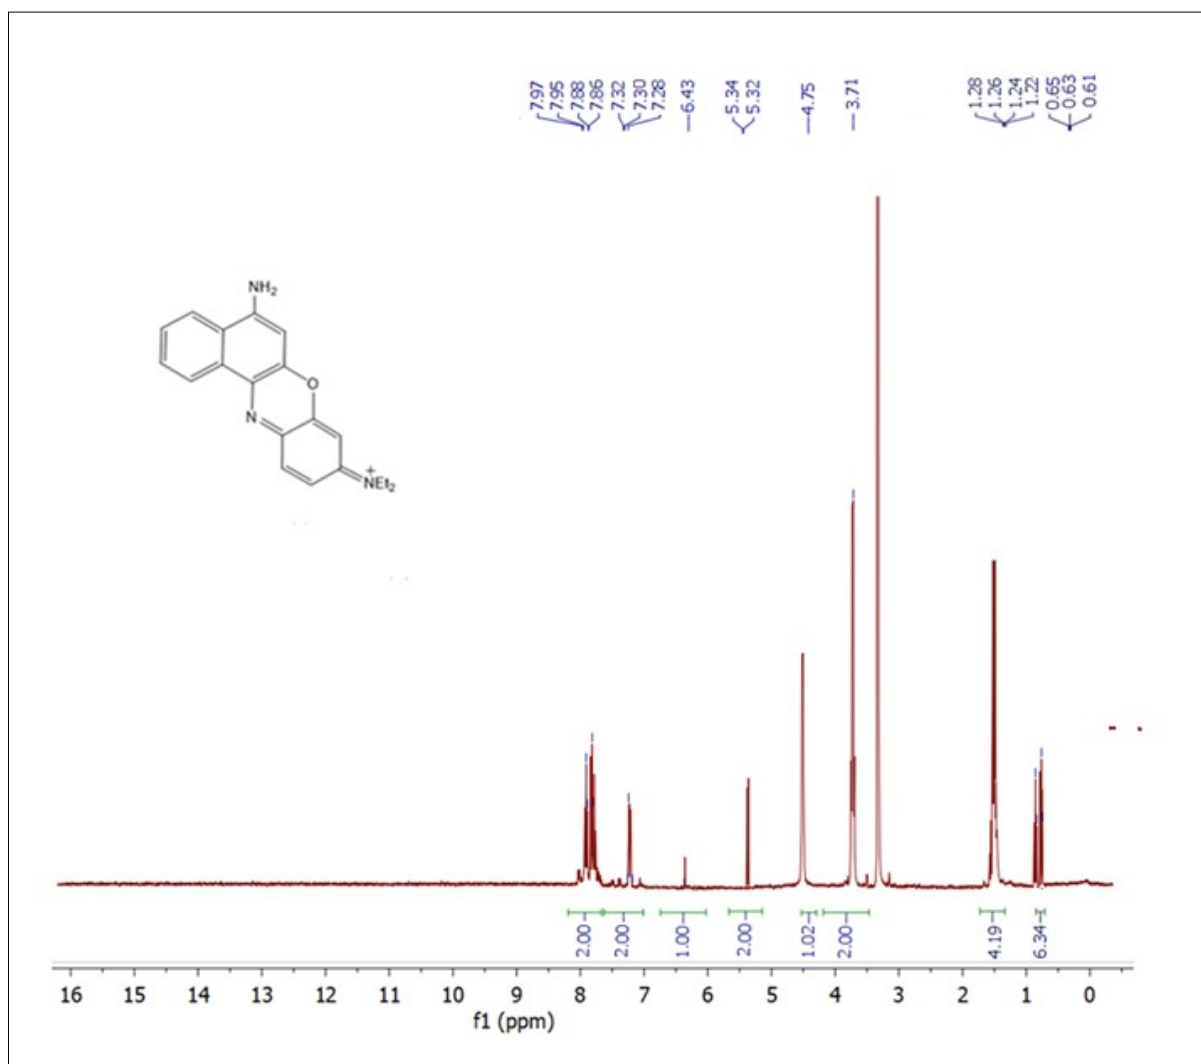

**Figure S1:** <sup>1</sup>H NMR of compound 3 in MeOH-d<sub>4</sub>

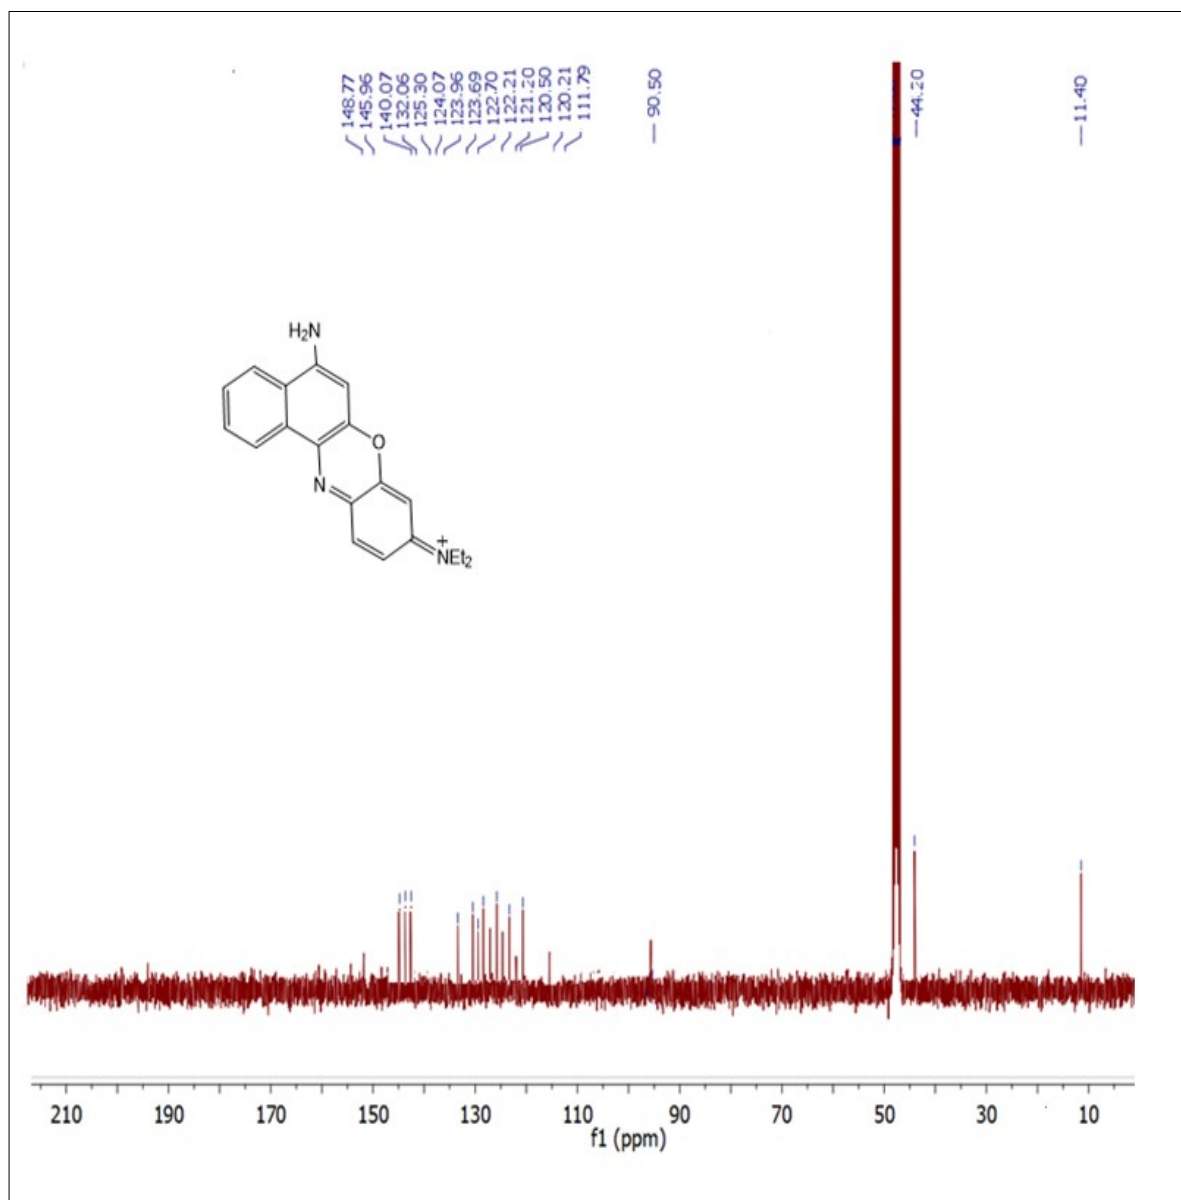

**Figure S2:**  $^{13}\text{C}$ NMR of compound **3** in  $\text{MeOH-d}_4$

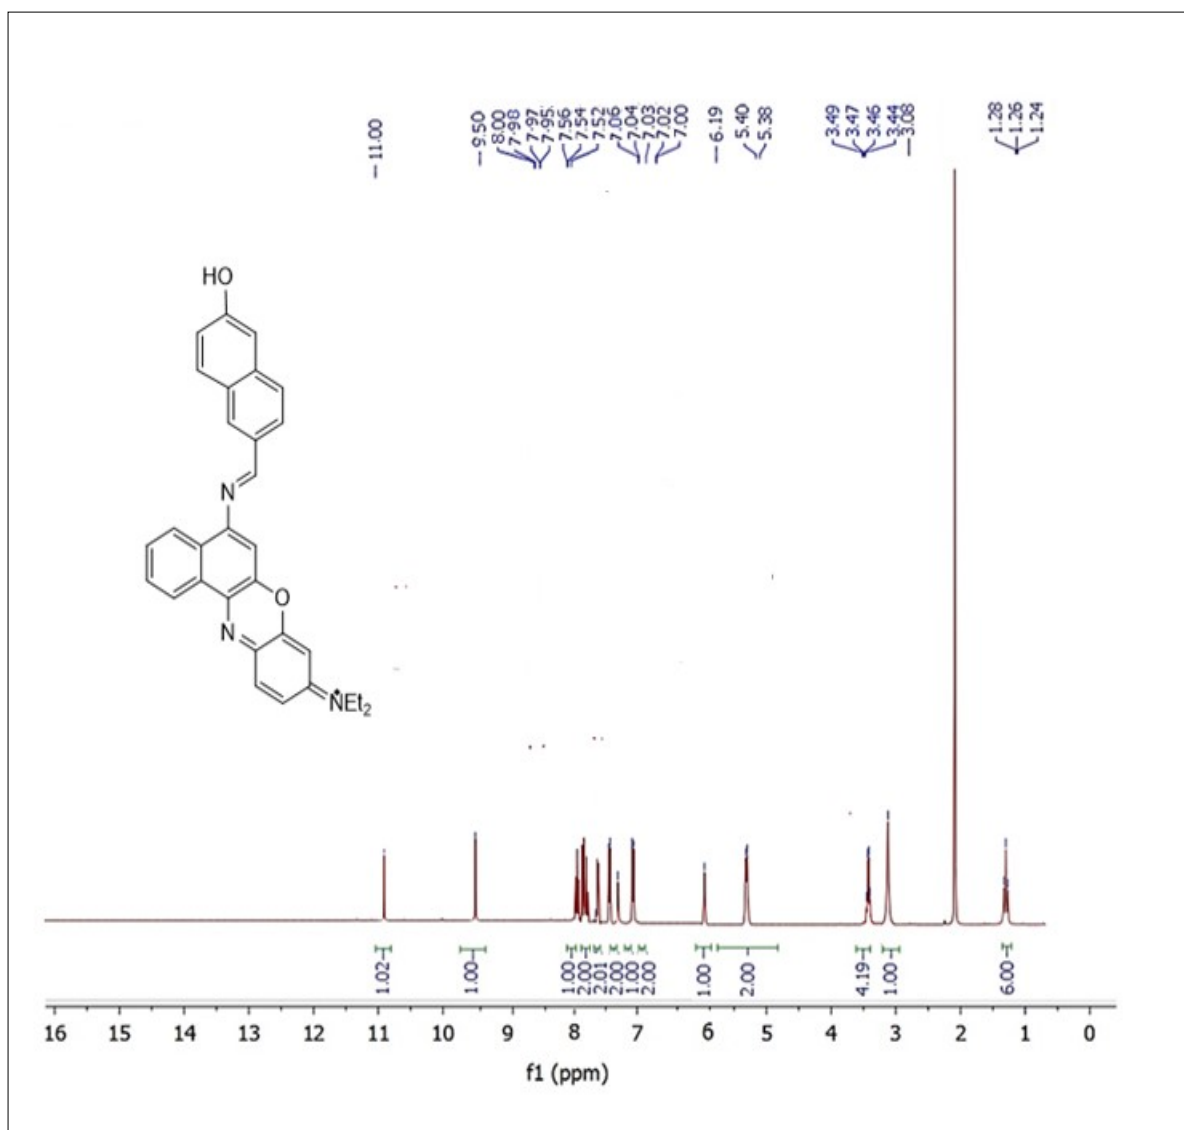

Figure S3: <sup>1</sup>H NMR of compound 4 in DMSO-d<sub>6</sub>

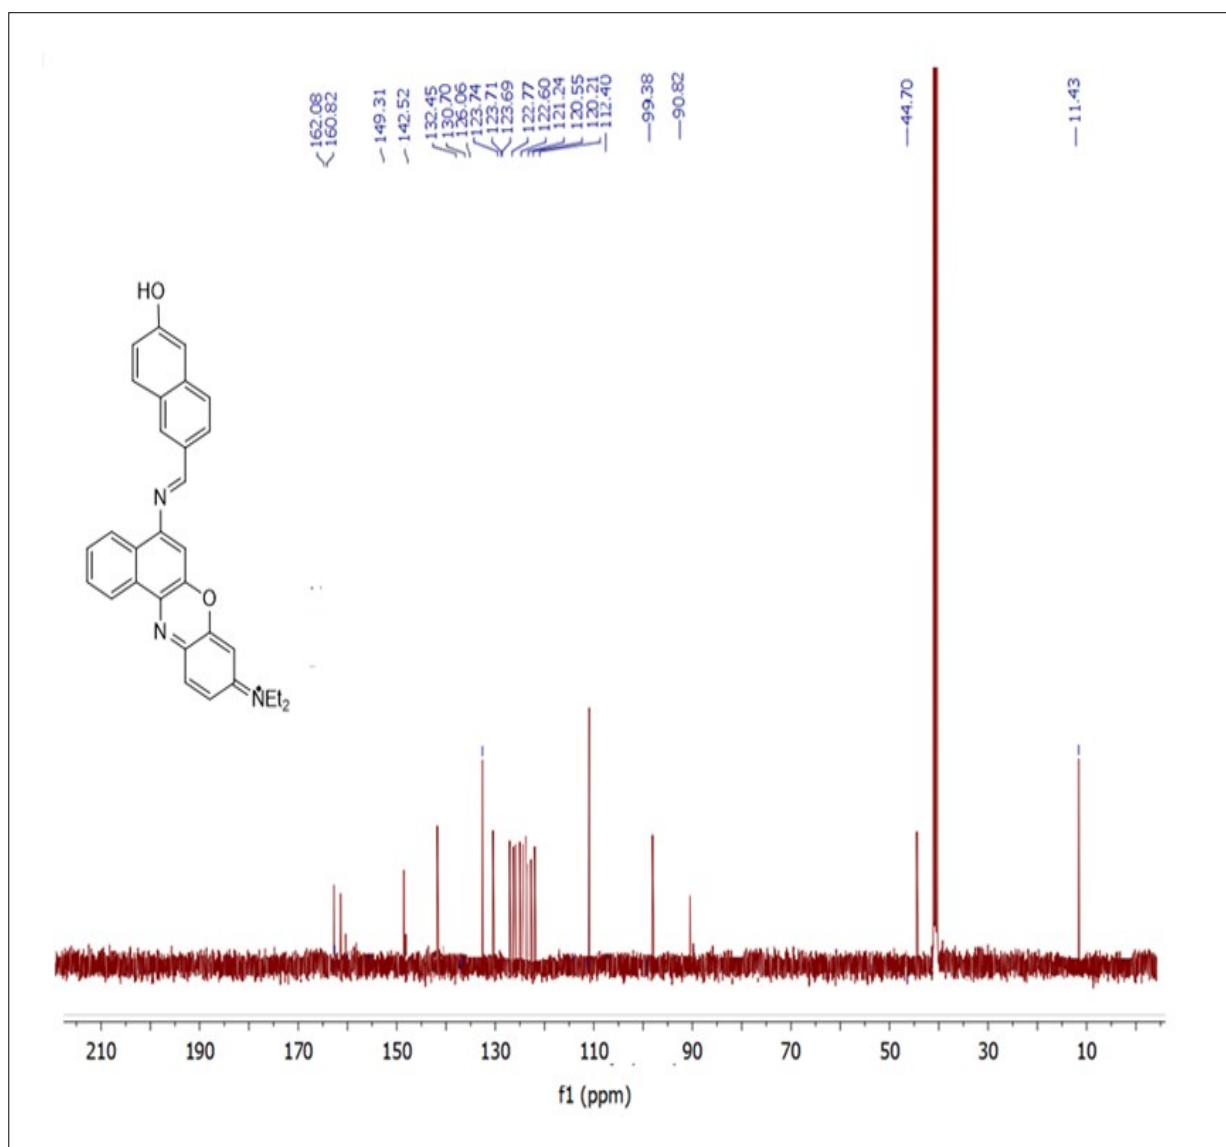

**Figure S4:** <sup>13</sup>CNMR of compound 4 in DMSO-d<sub>6</sub>

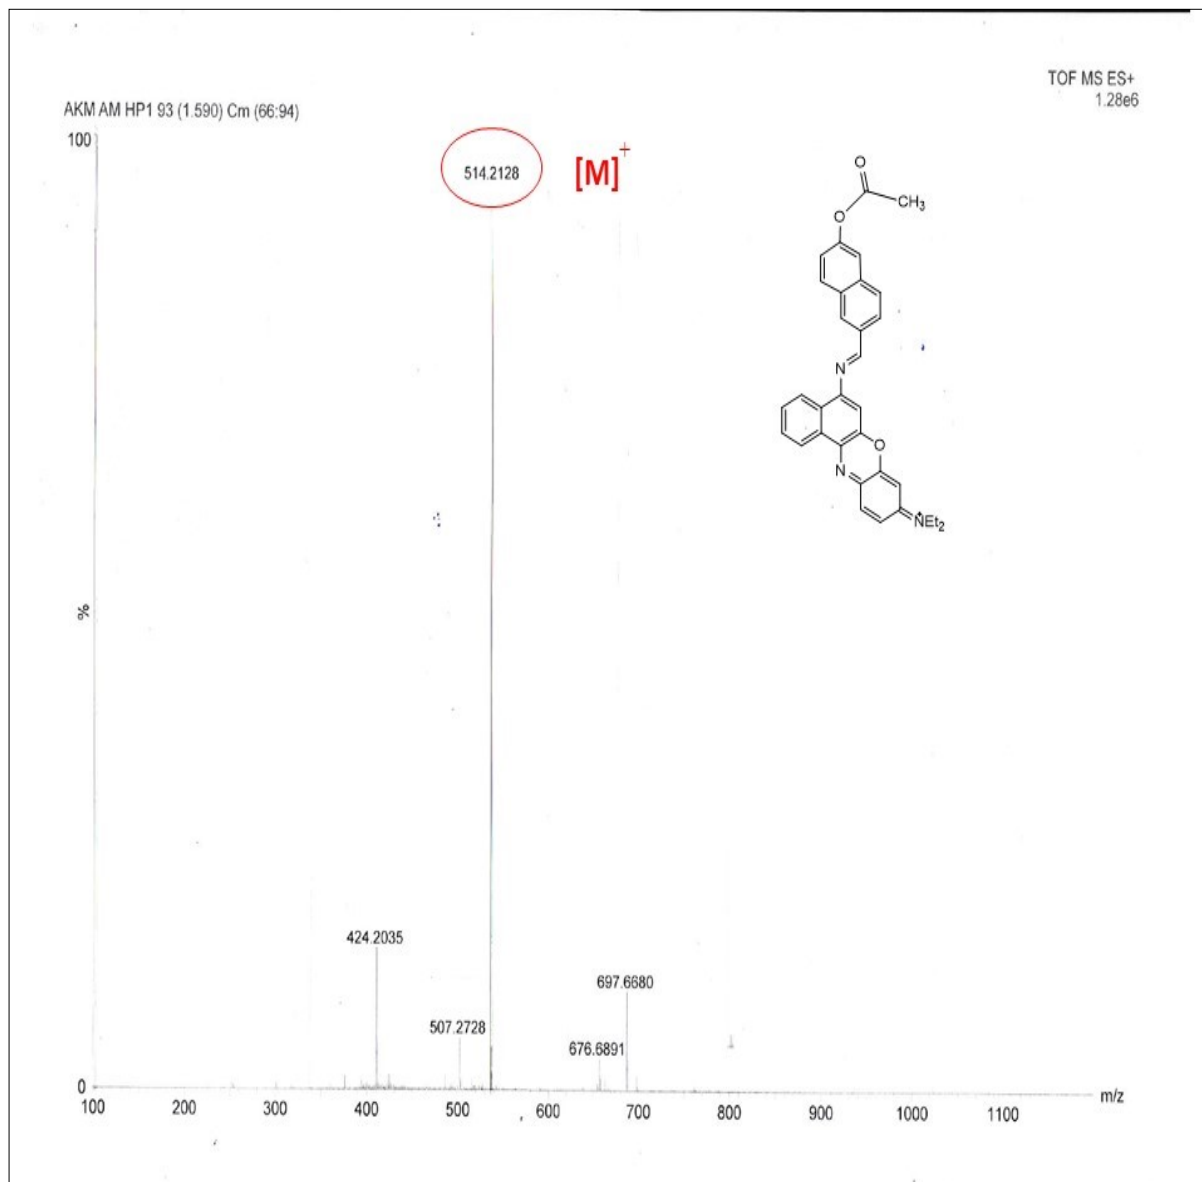

**Figure S5:** HRMS of probe **BPN**

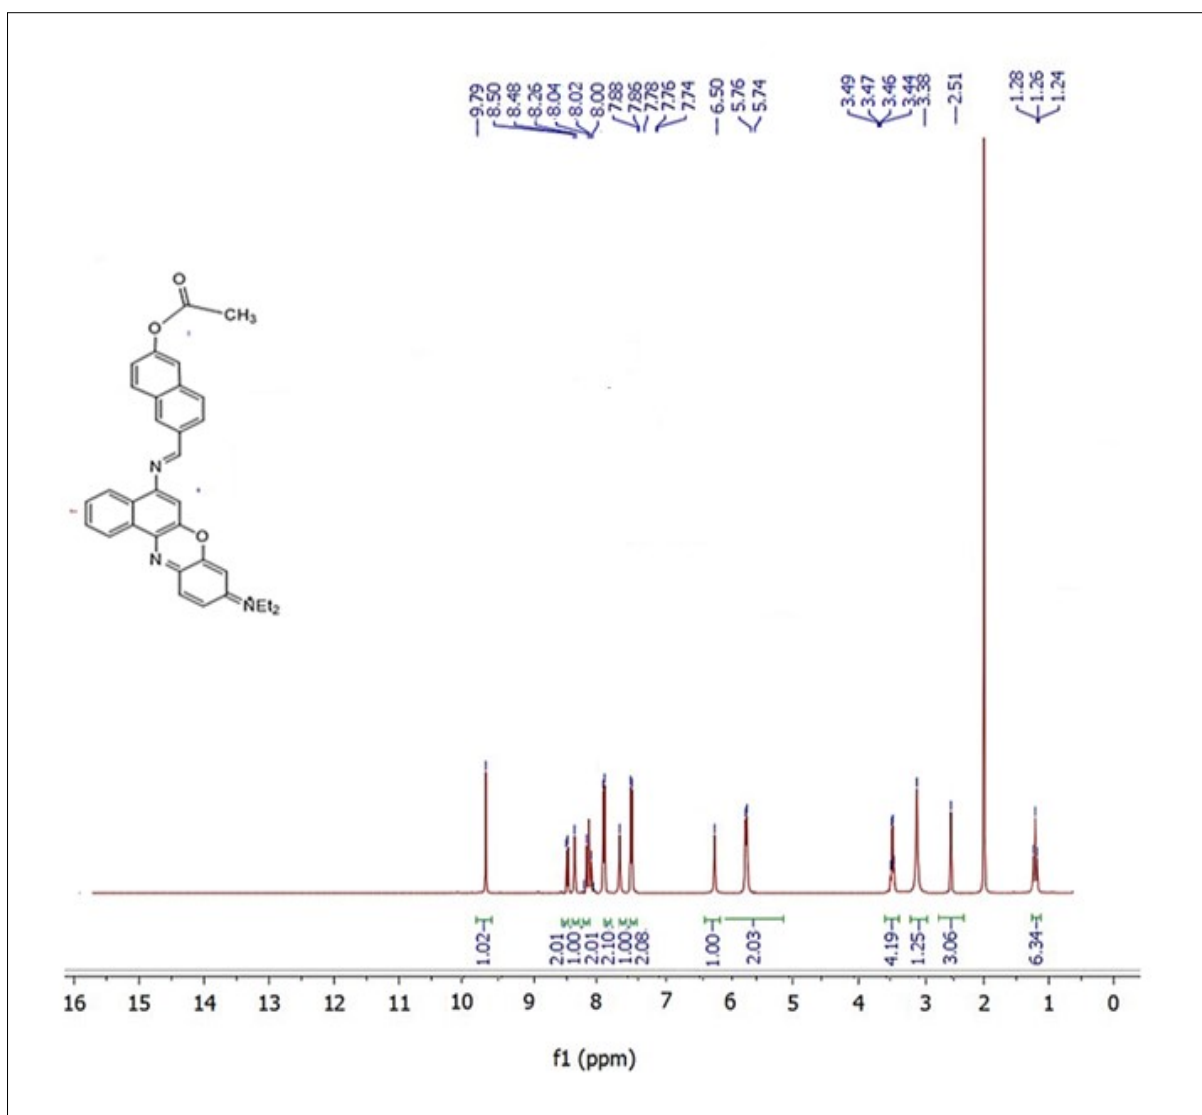

Figure S6: <sup>1</sup>H NMR of probe BPN in DMSO-d<sub>6</sub>



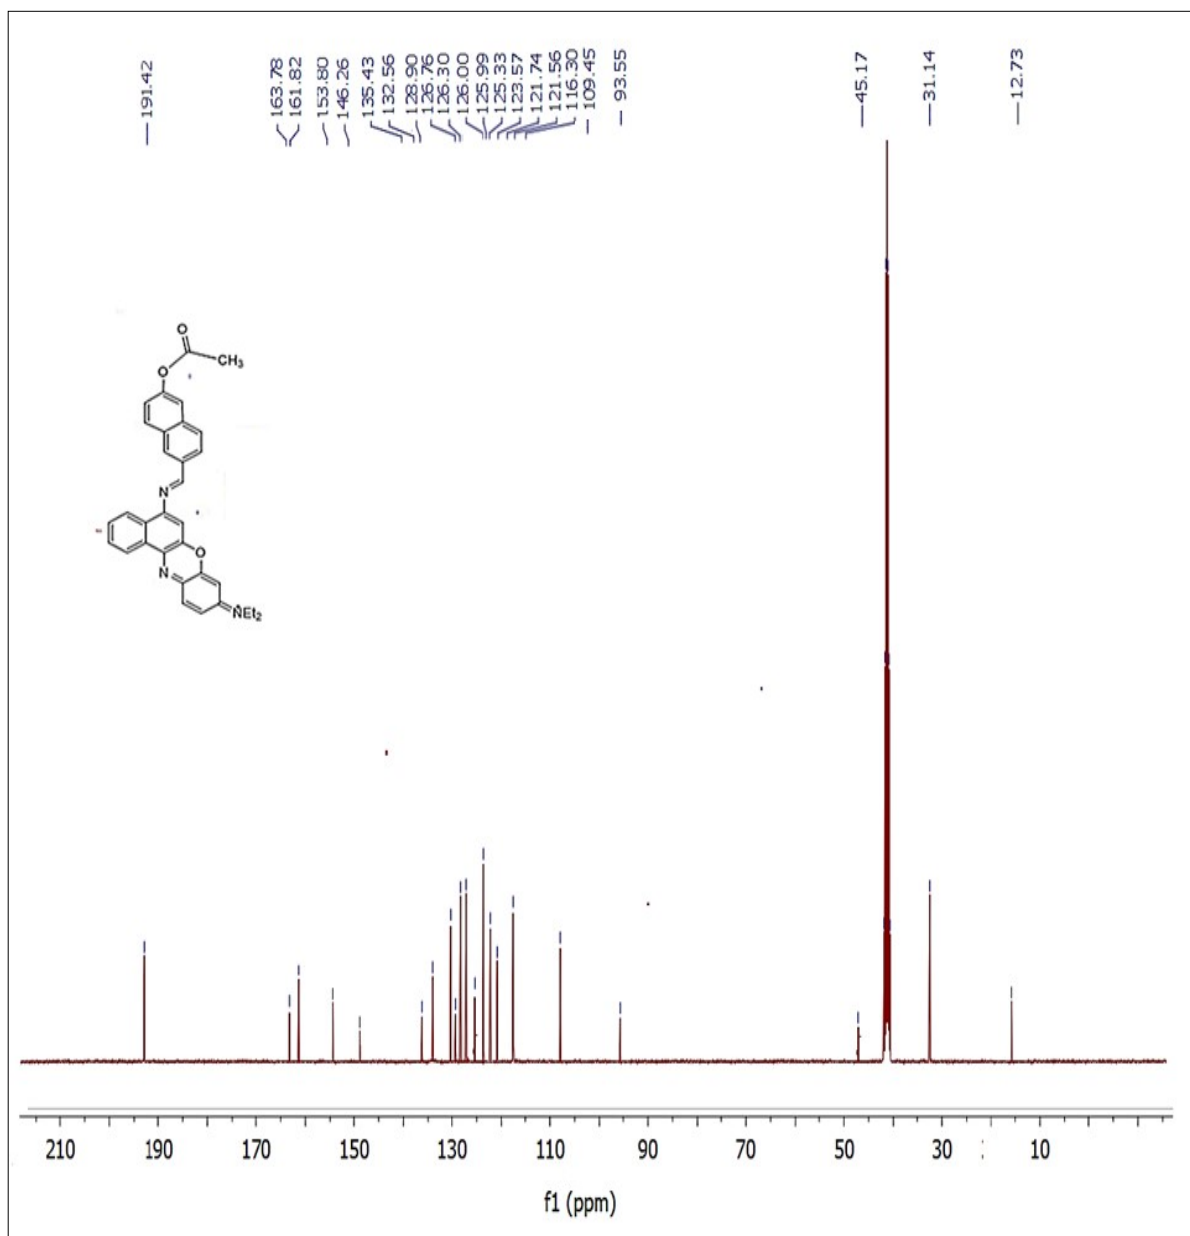

**Figure S7:**  $^{13}\text{C}$  NMR of probe BPN in  $\text{DMSO-d}_6$

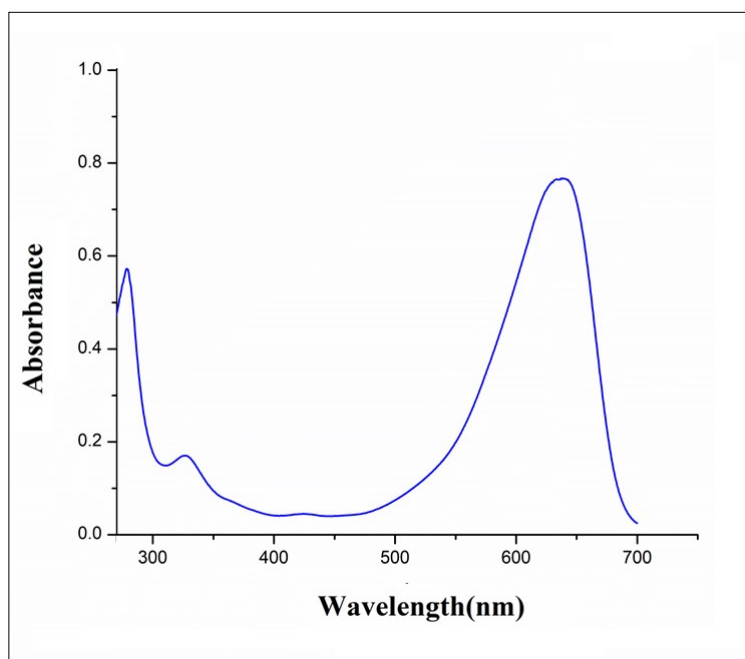

**FigureS8:**UV-vis absorbance of compound 3 ( $c = 4 \times 10^{-5}$  M) in aq. DMSO (DMSO/H<sub>2</sub>O = 1:9 v/v, 10 mM PBS buffer, pH = 7.4).

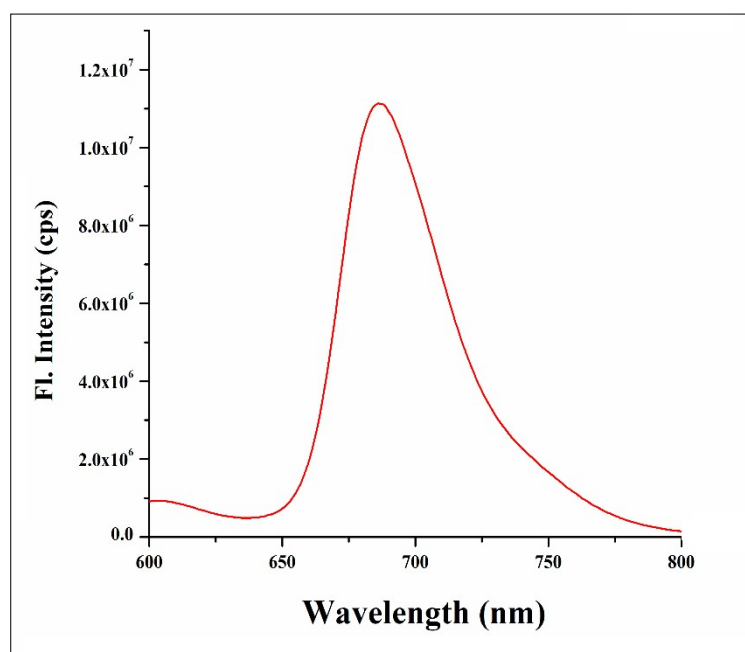

**Figure S9:** Fluorescence spectrum of compound 3 ( $c = 4 \times 10^{-5}$  M) in aq. DMS(DMSO/H<sub>2</sub>O = 1:9 v/v, 10 mM PBS buffer, pH = 7.4).

The quantum yield of compound 3 is 0.28 using Rhodamine B in ethanol as standard.

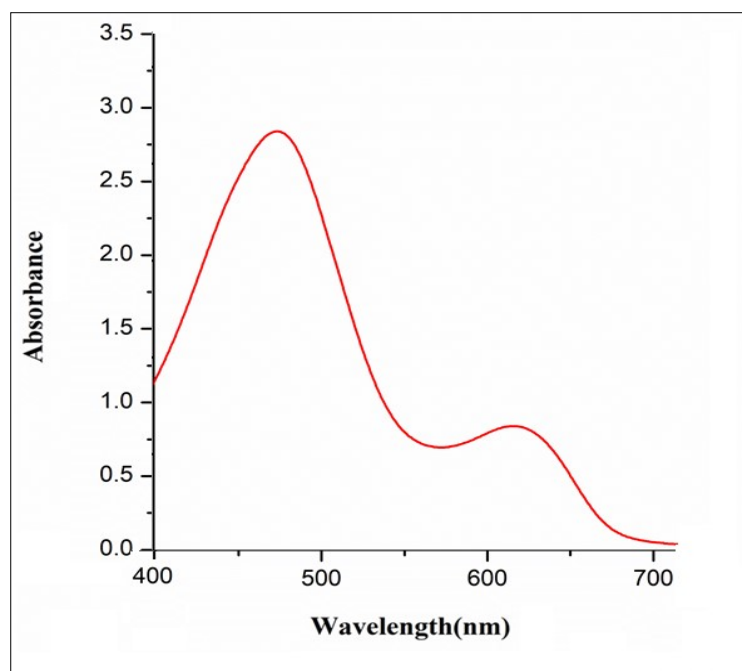

**Figure S10:** UV-vis absorbance of compound 4 ( $c = 4 \times 10^{-5}$  M) in aq. DMSO (DMSO/H<sub>2</sub>O = 1:9 v/v, 10 mM PBS buffer, pH = 7.4).

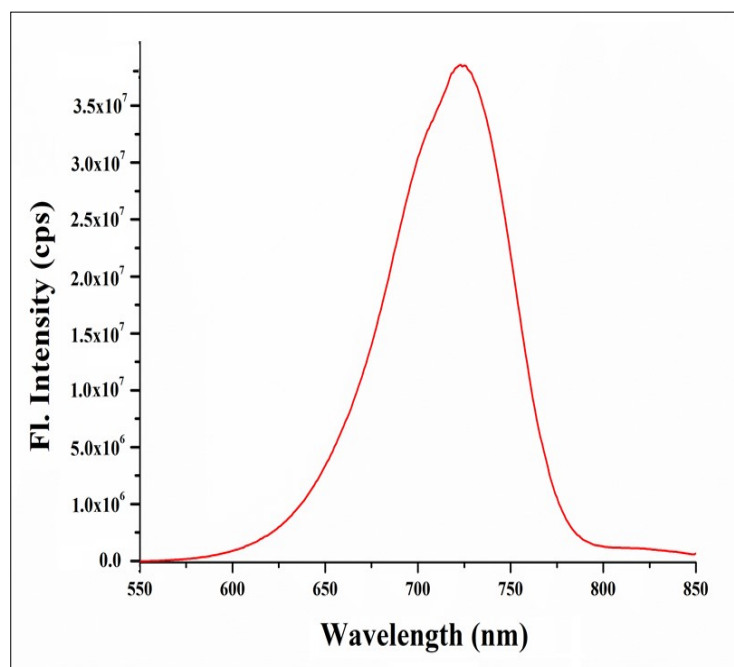

**Figure S11:** Fluorescence spectrum of compound 4 ( $c = 4 \times 10^{-5}$  M) in aq. DMSO (DMSO/H<sub>2</sub>O = 1:9 v/v, 10 mM PBS buffer, pH = 7.4).

The quantum yield of compound 4 is 0.62 using Rhodamine B in ethanol as standard.

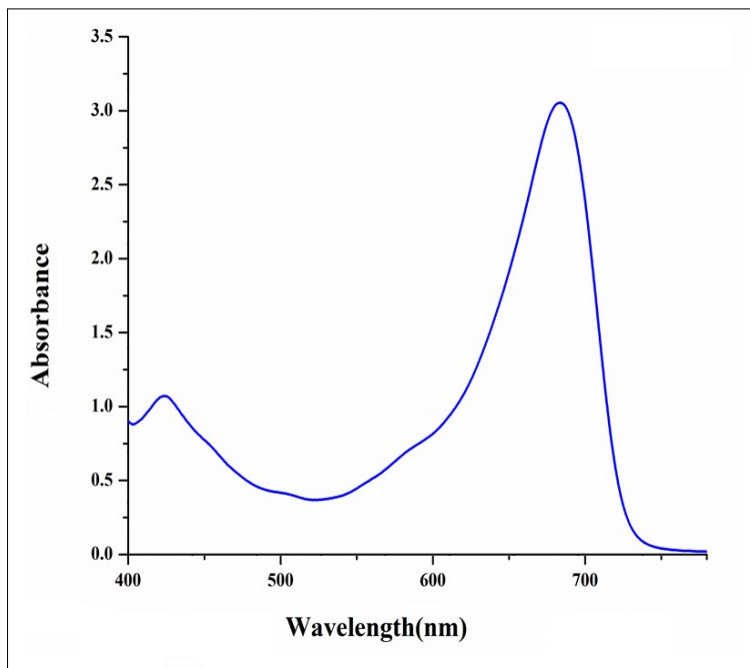

**Figure S12:** UV-vis absorbance of probe BPN ( $c = 4 \times 10^{-5}$  M) in aq. DMSO (DMSO/H<sub>2</sub>O = 1:9 v/v, 10 mM PBS buffer, pH = 7.4).

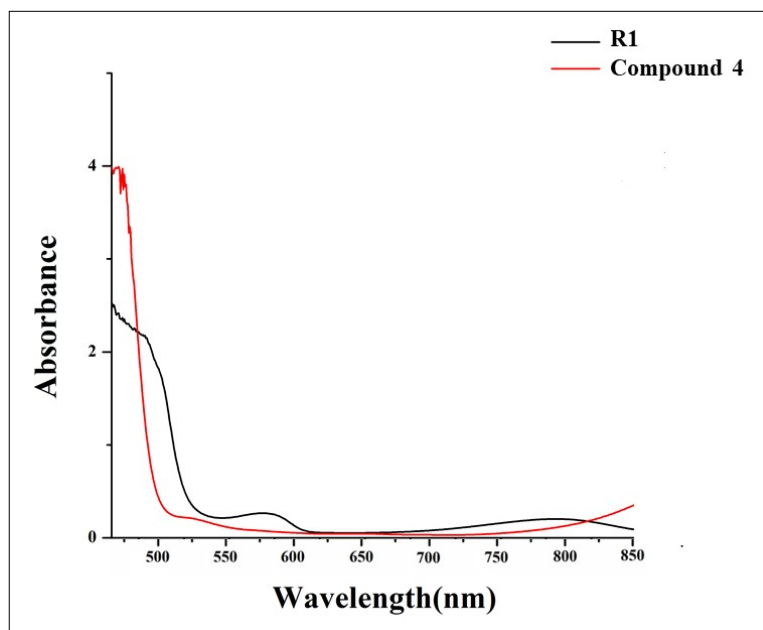

**Figure S13:** Comparative UV-vis absorption spectrum of compound 4 and R1 ( $c = 4 \times 10^{-5}$  M) in aq. DMSO (DMSO/H<sub>2</sub>O = 1:9 v/v, 10 mM PBS buffer, pH = 7.4)

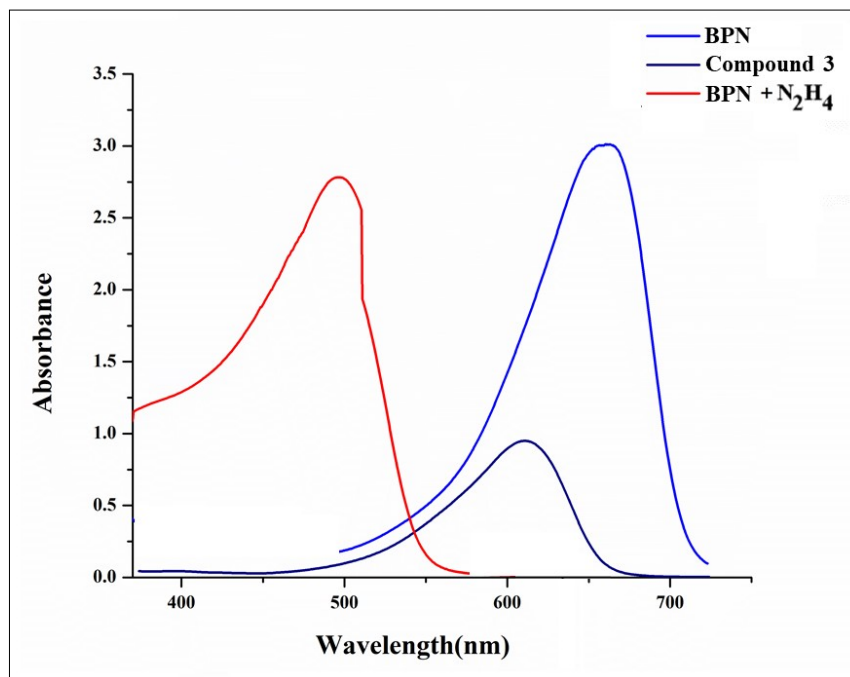

**Figure S14:** Comparative UV-vis absorption spectrum of probe BPN, Compound 3 and BPN treated with N<sub>2</sub>H<sub>4</sub> ( $c = 4 \times 10^{-5}$  M) in aq. DMSO (DMSO/H<sub>2</sub>O = 1:9 v/v, 10 mM PBS buffer, pH = 7.4).

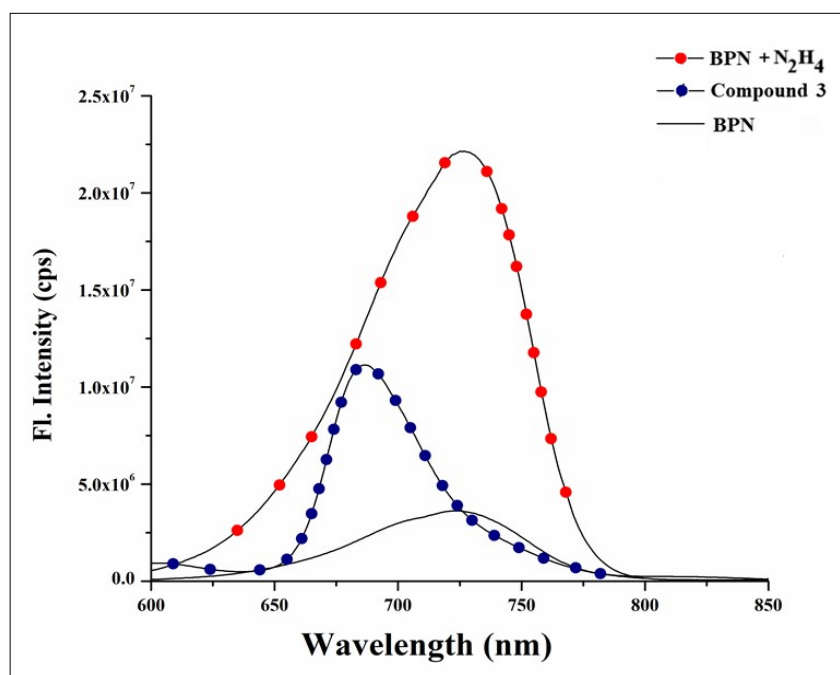

**Figure S15:** Comparative Fluorescence spectrum of probe BPN, Compound 3 and BPN treated with N<sub>2</sub>H<sub>4</sub> ( $c = 4 \times 10^{-5}$  M) in aq. DMSO (DMSO/H<sub>2</sub>O = 1:9 v/v, 10 mM PBS buffer, pH = 7.4).

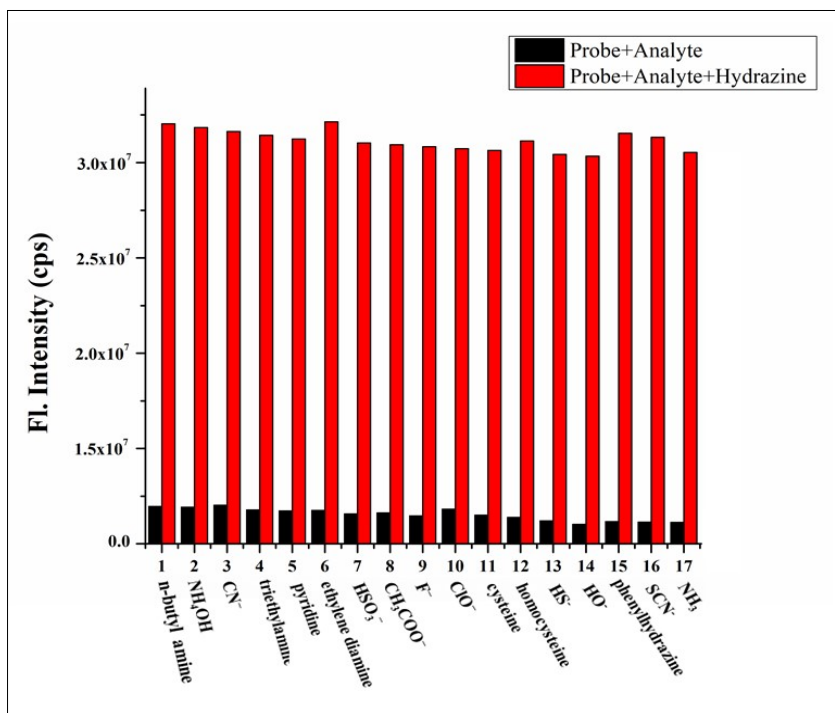

**Figure S16:** Change of fluorescence emission intensities of **BPN** ( $c = 4 \times 10^{-5}$  M) upon addition of other interfering analytes (20 equivalents) and then hydrazine (10 equivalents).

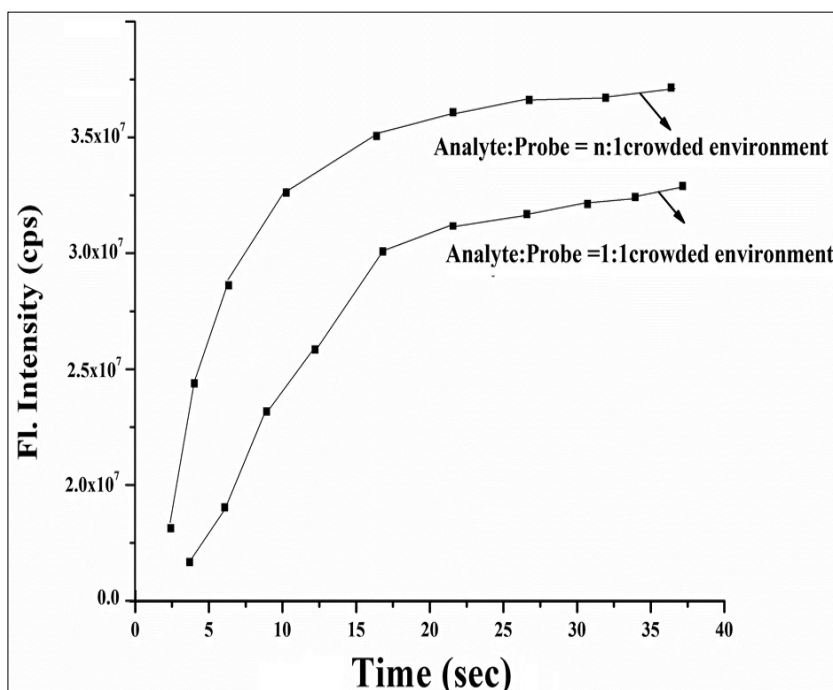

**Figure S17:** Change of fluorescence emission intensities of **BPN** in presence of hydrazine and other interfering analytes both in 1:1 and n:1 crowded environment.

## Calculation of Detection limit:

By using the following equation  $DL = K \cdot S_{b1} / S$ ; the detection limit (DL) of probe BPN for  $N_2H_4$  was calculated, where  $K = 2$  or  $3$  (we take  $2$  in this case);  $S_{b1}$  is the standard deviation of the blank solution;  $S$  is the slope of the calibration curve.

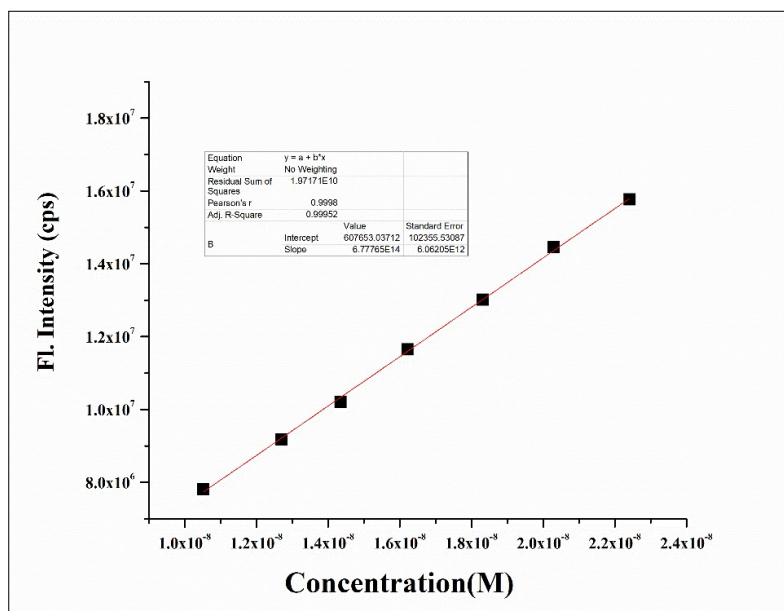

**Figure S18:** From the graph we get slope ( $S$ ) =  $6.77765 \times 10^{14}$ , Standard deviation ( $S_{b1} = 102355.53087$ ). Thus, using the formula, we get the detection limit =  $4.5 \times 10^{-10}$  M

## Kinetic study of probe BPN:

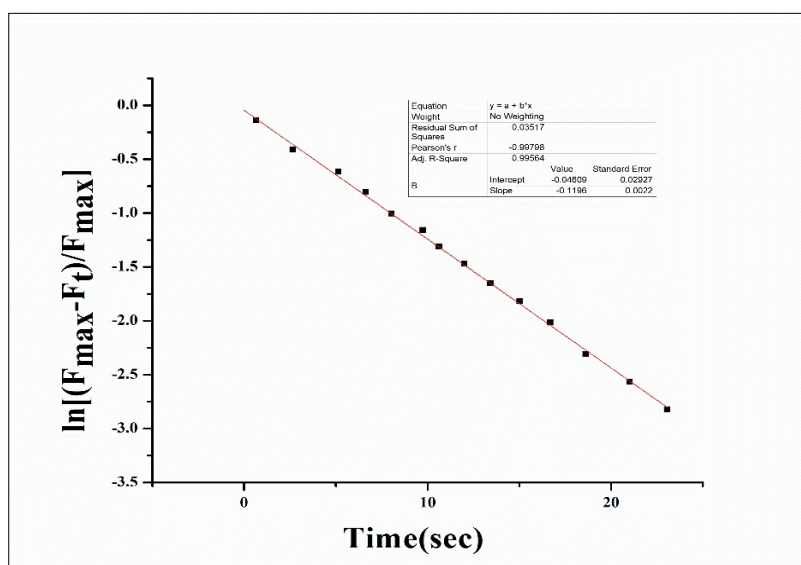

**Figure S19:** Pseudo first order kinetic diagram of probe BPN ( $1 \times 10^{-5}$  M) with  $N_2H_4$  ( $1 \times 10^{-4}$  M) in DMSO- $H_2O$ .

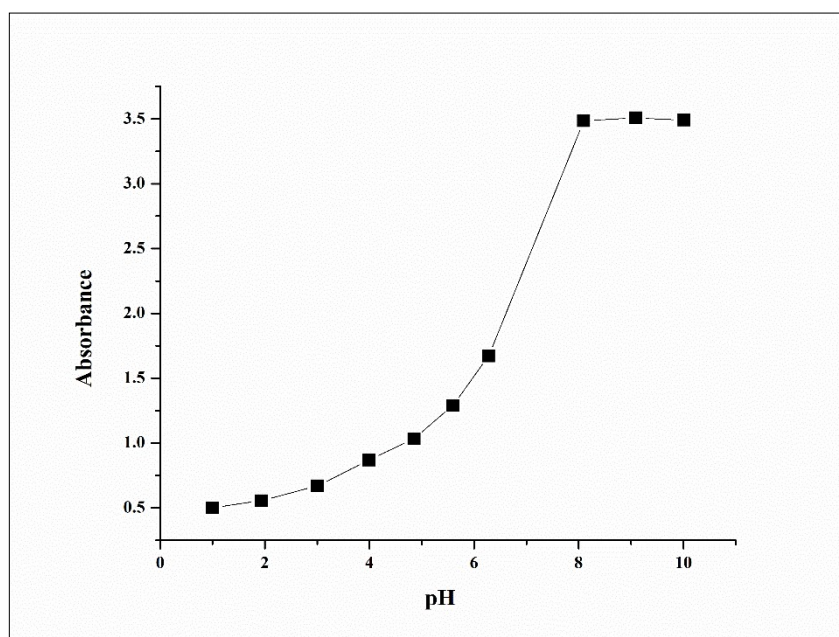

**Figure S20:** pH mediated absorbance change of probe **BPN** in presence of hydrazine.

### Calculation of fluorescence quantum yield of **BPN** and **BPN-N<sub>2</sub>H<sub>4</sub>** adduct:

Here, the fluorescence quantum yield  $\Phi$  was calculated by using the following equation:

$$\Phi_x = \Phi_s (F_x/F_s) (A_s /A_x) (\eta_x^2 / \eta_s^2)$$

Where,

X and S indicate the unknown and standard solution respectively,  $\Phi$  = quantum yield

F = Area under the emission curve, A= Absorbance at the excitation wavelength,

$\eta$ = Refractive index of solvent. Here  $\Phi$  measurements were performed using Rhodamine B in ethanol as standard [ $\Phi = 0.49$ ]

The fluorescence quantum yield of **BPN** and **BPN-N<sub>2</sub>H<sub>4</sub>** product was calculated by taking Rhodamine B ( $\Phi = 0.49$  in ethanol) as standard.

$\eta_s = 1.3614$  (for ethanol);  $\eta_x = 1.479$  (for DMSO)

The quantum yield of **BPN** was calculated using the above equation and the value is 0.0075.

The quantum yield of **BPN-N<sub>2</sub>H<sub>4</sub>** adduct was calculated using the above equation and the value is 0.6193.



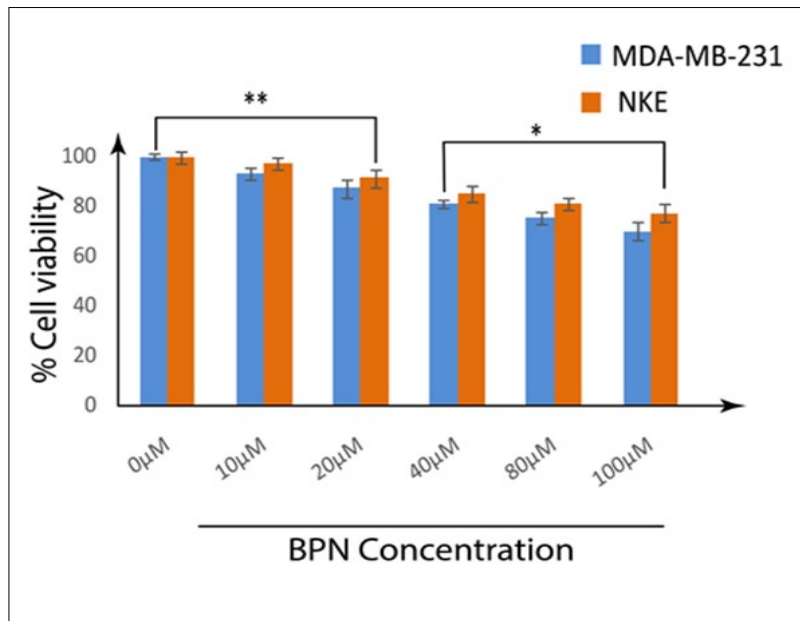

**FigureS21:** Cell survivability of MDA-MB 231 and NKE cells exposed to different probe **BPN** concentration. Data are representative of at least three independent experiments and bar graph shows mean  $\pm$  SEM, \*\* $p < 0.001$ , \* $p < 0.01$  were interpreted as statistically significant, as compared with the control.

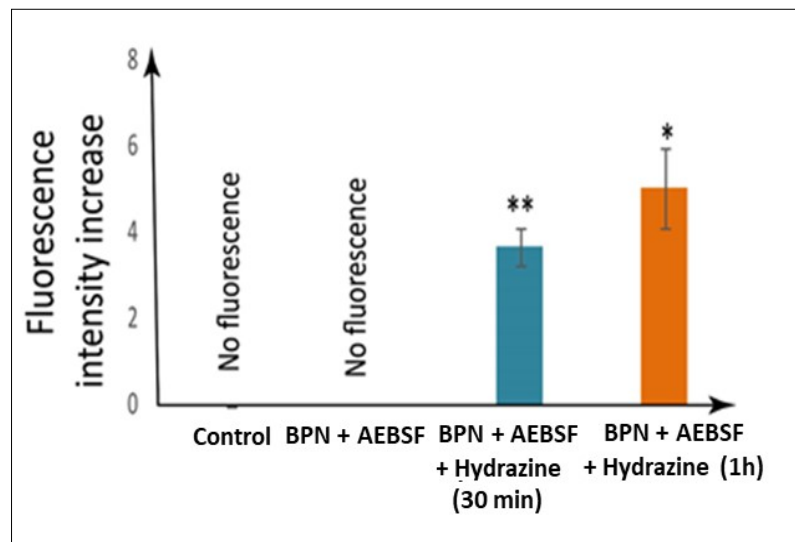

**Figure S22:** Pictorial fluorescence intensity variation of untreated MDA-MB 231 cells (Control), cells treated with probe **BPN** (10µM) + AEBSF(1 mM), probe **BPN** (10µM) + AEBSF (1 mM) + Hydrazine together after 30 min and 1h, incubation period.

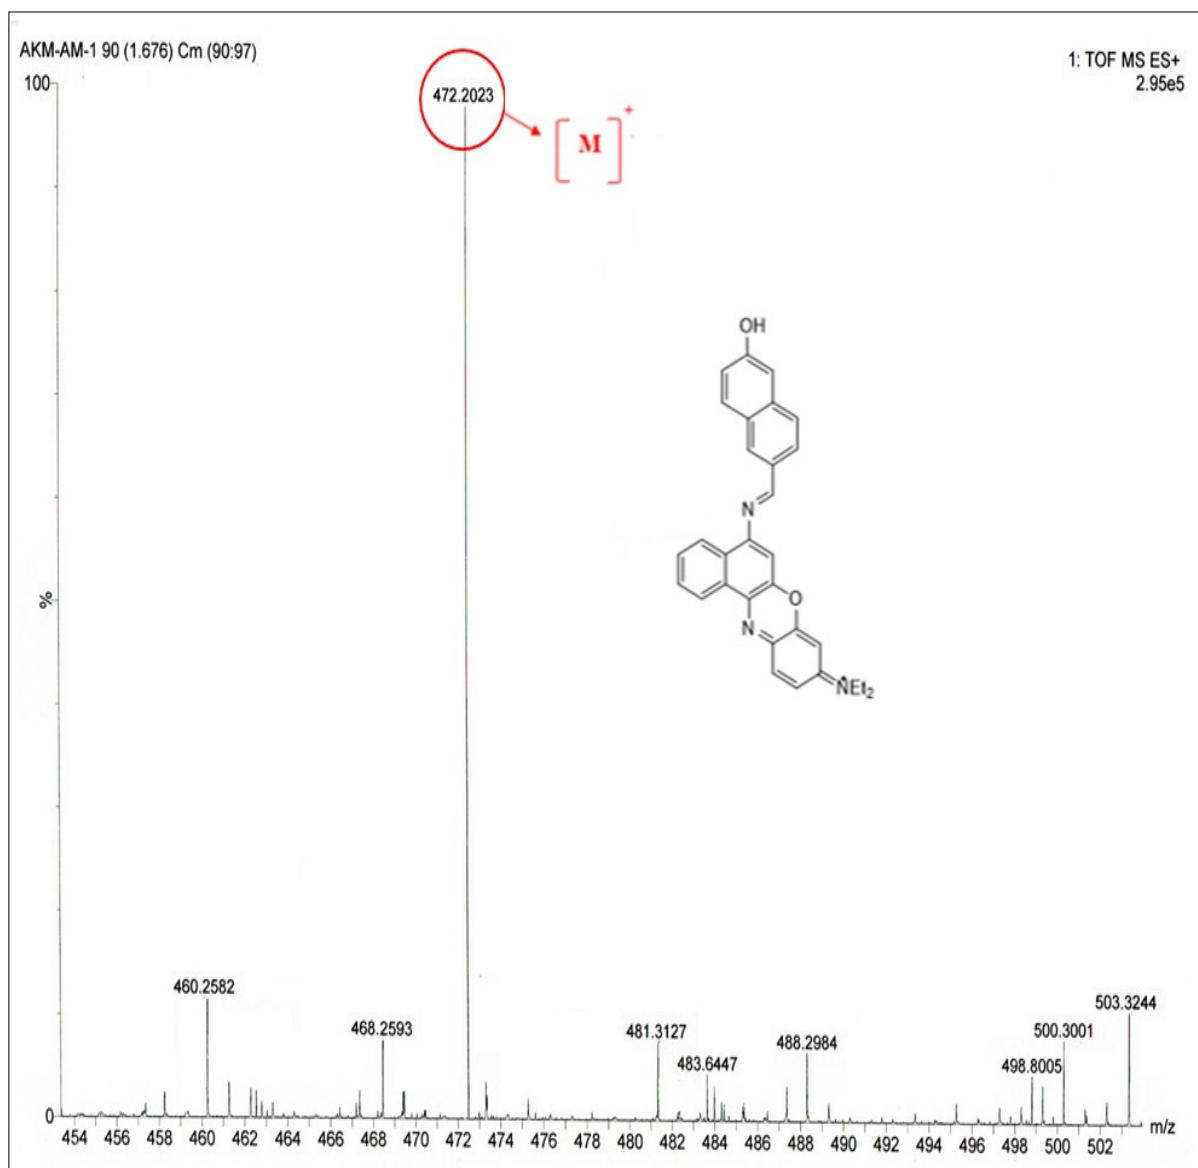

Figure S23: HRMS of BPN-N<sub>2</sub>H<sub>4</sub> adduct.

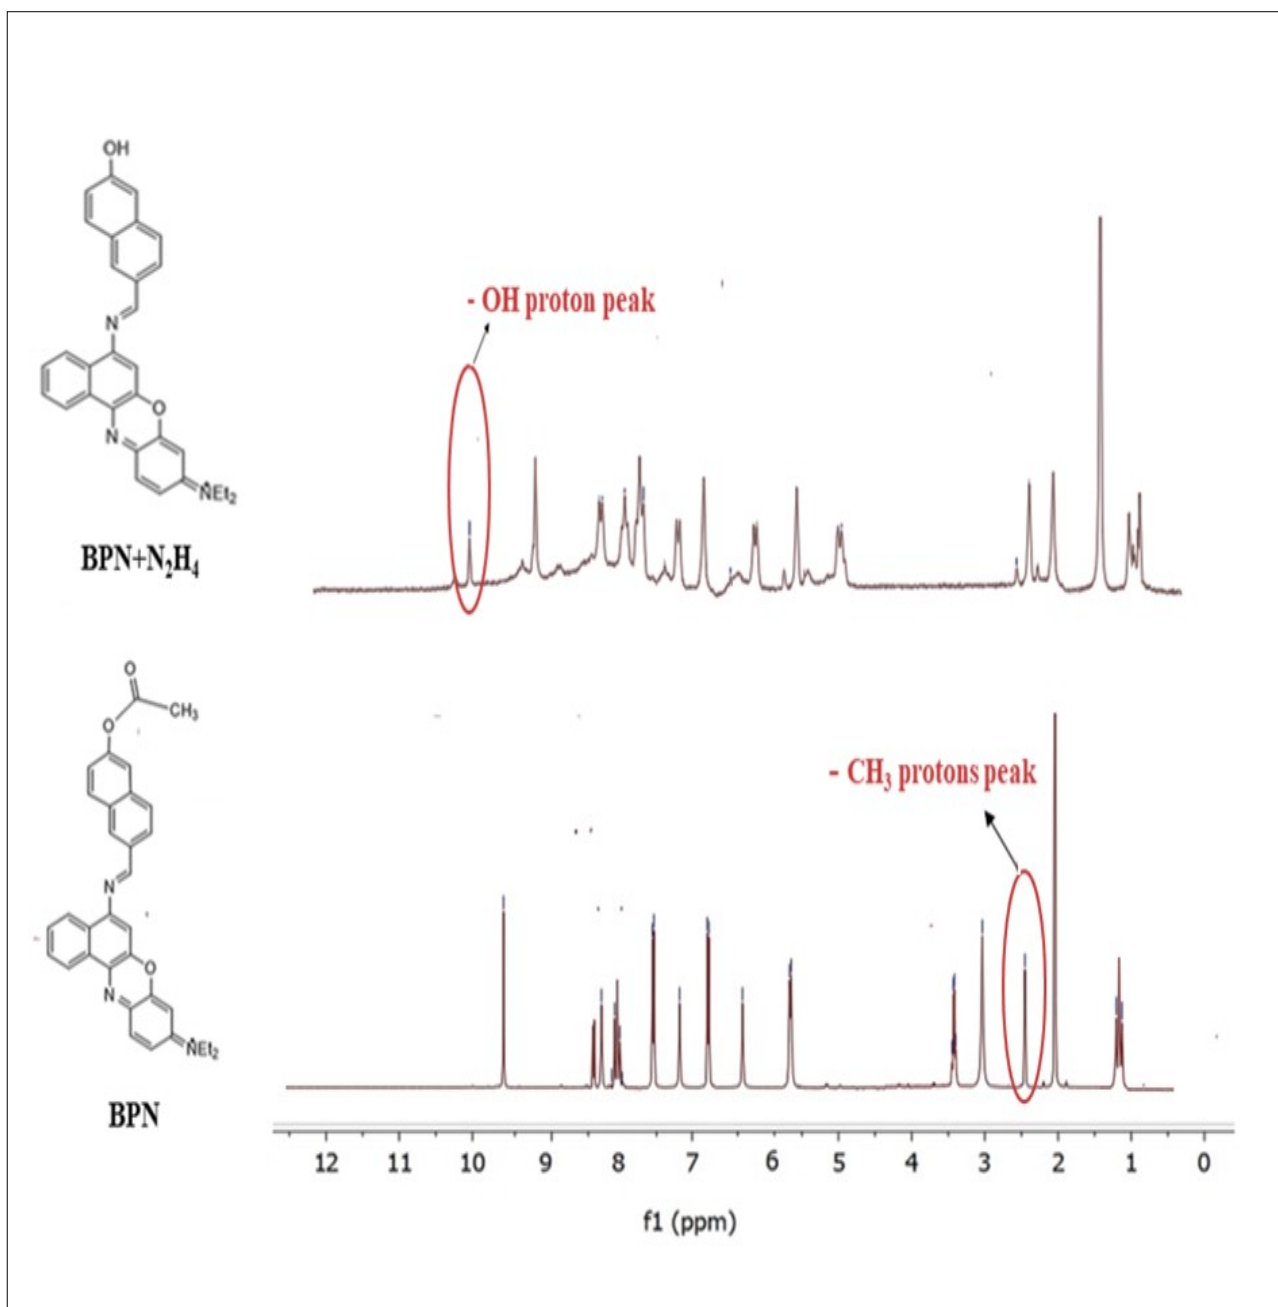

**Figure S24:** <sup>1</sup>H NMR titration of probe **BPN** with hydrazine.

**Table S2: Comparison data of previously reported N<sub>2</sub>H<sub>4</sub> sensors with current data**

| Sl. No | Probe structure                                                                     | Excitation                                  | Emission in presence of hydrazine                               | Detection limit | Response time | Application                                                   | Reference |
|--------|-------------------------------------------------------------------------------------|---------------------------------------------|-----------------------------------------------------------------|-----------------|---------------|---------------------------------------------------------------|-----------|
| 1.     | 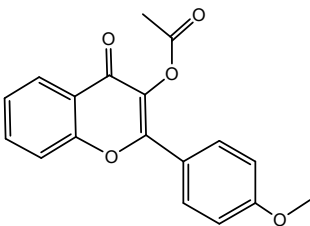   | 370 nm                                      | 415 nm <sup>Ⓜ</sup> (N* form) and 540 nm <sup>Ⓜ</sup> (T* form) | 10 μM           | 60 min        | Live stem cell and <i>invivo</i> zebrafish imaging            | [1]       |
| 2.     |   | 480 nm                                      | 542 nm <sup>Ⓜ</sup>                                             | 5.4 ppb         | 10 min        | Live HeLa cell and <i>invivo</i> zebrafish imaging            | [2]       |
| 3.     |  | 540 nm <sup>Ⓜ</sup> and 730 nm <sup>Ⓜ</sup> | 662 nm <sup>Ⓜ</sup> to 825 nm <sup>Ⓜ</sup>                      | 2.56 ppb        | 7 min         | Live cell, kidney tissue and <i>invivo</i> mouse body imaging | [3]       |
| 4.     |  | 385 nm                                      | 445 nm <sup>Ⓜ</sup> to 545 nm <sup>Ⓜ</sup>                      | 9.40 nM         | 5 min         | Live cell and <i>invivo</i> zebrafish imaging                 | [4]       |

|    |                                                                                     |        |                                               |             |        |                                                                                                                        |     |
|----|-------------------------------------------------------------------------------------|--------|-----------------------------------------------|-------------|--------|------------------------------------------------------------------------------------------------------------------------|-----|
| 5. | 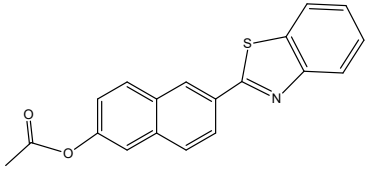   | -      | 390 nm <sup>2</sup><br>to 508 nm <sup>2</sup> | 0.96<br>μM  | 60 min | Live HeLa<br>cell imaging                                                                                              | [5] |
| 6. |    | 350 nm | 440 nm <sup>2</sup>                           | 8.47<br>nM  | 180s   | Live cancer<br>cell<br>imaging                                                                                         | [6] |
| 7. |   | 430 nm | 532 nm <sup>2</sup>                           | 1.72<br>ppb | -      | Livecell,<br>kidney<br>tissue and<br><i>invivomous</i><br>e body<br>imaging                                            | [7] |
| 8. |  | 560 nm | 680 nm <sup>2</sup>                           | 57 nM       | 1 min  | (a)Detection<br>in living<br>cells (MCF-<br>7 cells); (b)<br>Detection of<br>hydrazine in<br>solution by<br>test kits. | [8] |
| 9. |  | 592 nm | 654 nm <sup>2</sup>                           | 3.4<br>ppb  | -      | Live HeLa<br>cell<br>imaging.                                                                                          | [9] |

|     |                                                                                    |        |                     |                           |        |                                                            |          |
|-----|------------------------------------------------------------------------------------|--------|---------------------|---------------------------|--------|------------------------------------------------------------|----------|
| 10. | 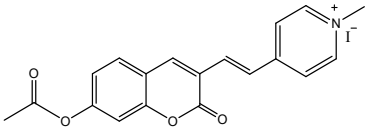  | 510 nm | 559 nm <sup>2</sup> | -                         | 60 min | Live cell imaging                                          | [10]     |
| 11. |   | 675 nm | 706 nm <sup>2</sup> | 5.4 ppb                   | 10 min | Livecell, kidney and <i>invivo</i> mouse body imaging      | [11]     |
| 12. |  | 590 nm | 725 nm <sup>2</sup> | 4.5 × 10 <sup>-10</sup> M | 4s     | Livecell imaging and vapor phase detection by test strips. | Our Work |

### References:

- [1] B. Liu, Q. Liu, M. Shah, J. Wang, G. Zhang and Y. Pang, *Sens. Actuators, B*, 2014, **202**,194–200.
- [2] Q. Fang, L. Yang, H. Xiong, S. Han, Y. Zhang, J. Wang, W. Chen and X. Song, *Chinese Chem. Lett.*, 2019, 2–5.
- [3] Y. Song, G. Chen, X. Han, J. You and F. Yu, *Sens. Actuators, B*, 2019, **286**, 69–76.
- [4] X. Xia, F. Zeng, P. Zhang, J. Lyu, Y. Huang and S. Wu, *Sens. Actuators, B*, 2016, **227**, 411-418.
- [5] C. Liu, K. Liu, M. Tian and W. Lin, *Spectrochim. Acta A*, 2019, **212**, 42–47.
- [6] X. Wang, G. Ding, Y. Wang, S. Mao, K. Wang, Z. Ge, Y. Zhang, X. Li and C. H. Hung, *Tetrahedron Lett.*, 2020, **76**, 131726.
- [7] T. Li, J. Liu, L. Song, Z. Li, Q. Qi and W. Huang, *J. Mater. Chem. B*, **2019**, 7, 3197–3200.
- [8] S. Zhang, D. Chen, L. Yan, Y. Xie, X. Mu, J. Zhu, *Microchem.*, **2020**, 157, 105066.

- [9] S. H. Guo, T. H. Leng, K. Wang, Y. J. Shen and C.Y. Wang, *Spectrochim. Acta A*, 2019, **223**, 117344.
- [10] Y.-Z. Ran, H.-R. Xu, K. Li, K. -K. Yu, J. Yang and X. -Q. Yu, *RSC Adv.*, **2016**, 6, 111016-111019.
- [11] J. Zhang, L. Ning, J. Liu, J. Wang, B. Yu, X. Liu, X. Yao, Z. Zhang and H. Zhang, *Anal. Chem.*, 2015, 87, 9101–9107.
